# Supplementary material for: Cytotoxic 1,3-Thiazole and 1,2,4-Thiadiazole Alkaloids from Penicillium oxalicum: Structural Elucidation and Total Synthesis
Source: PubMed Central journal article supplement (PMC6273271; doi:10.3390/molecules21030232), 2016-02-26
Supplement: molecules-21-00232-s001.pdf [file molecules-21-00232-s001.pdf]

# Supplementary Materials: Cytotoxic 1,3-Thiazole and 1,2,4-Thiadiazole Alkaloids from *Penicillium oxalicum*: Structural Elucidation and Total Synthesis

Zheng Yang, Nianyu Huang, Bang Xu, Wenfeng Huang, Tianpeng Xie, Fan Cheng and Kun Zou

## Table of Contents

|                                                                                                                                                                   |     |
|-------------------------------------------------------------------------------------------------------------------------------------------------------------------|-----|
| 1. <sup>1</sup> H-NMR and <sup>13</sup> C-NMR Spectra for the compounds <b>1g</b> , <b>1</b> , <b>2c</b> , <b>2</b> , <b>3a</b> , <b>3</b> , <b>4b</b> , <b>4</b> | S2  |
| 2. HPLC and <sup>13</sup> C-NMR comparing analysis                                                                                                                | S11 |
| 3. The crystal structure of <b>1g</b> with numbered atoms                                                                                                         | S14 |
| 4. The crystal structure of <b>2</b> with numbered atoms                                                                                                          | S14 |

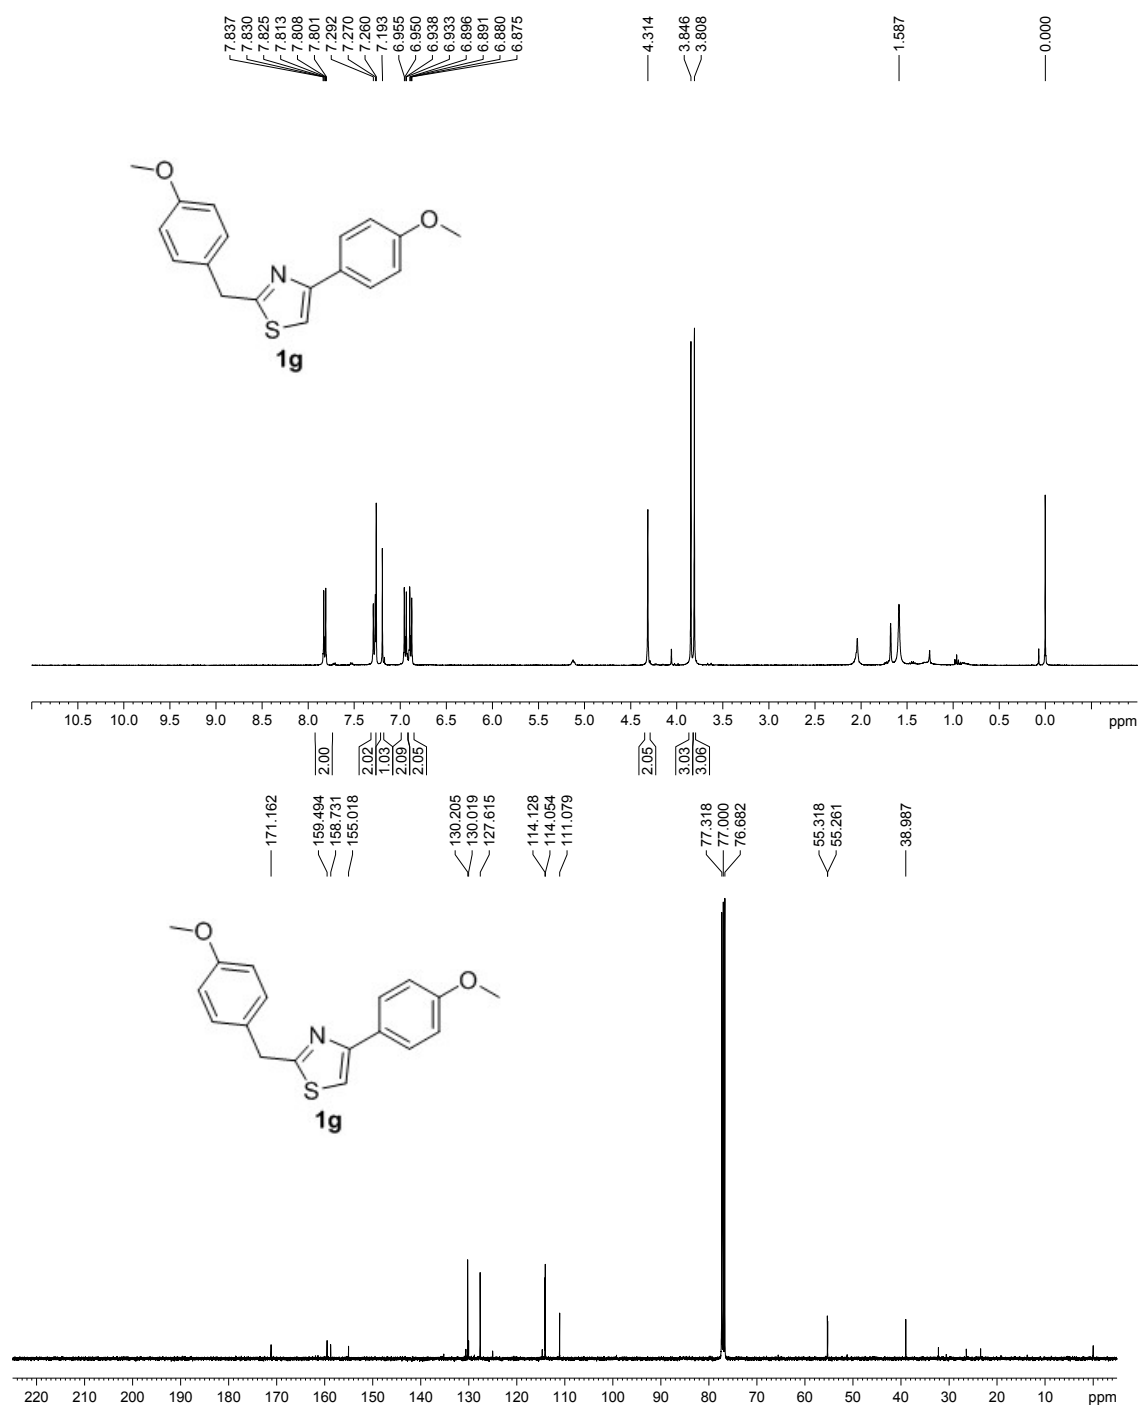Figure S1. <sup>1</sup>H-NMR and <sup>13</sup>C-NMR of compound 1g.

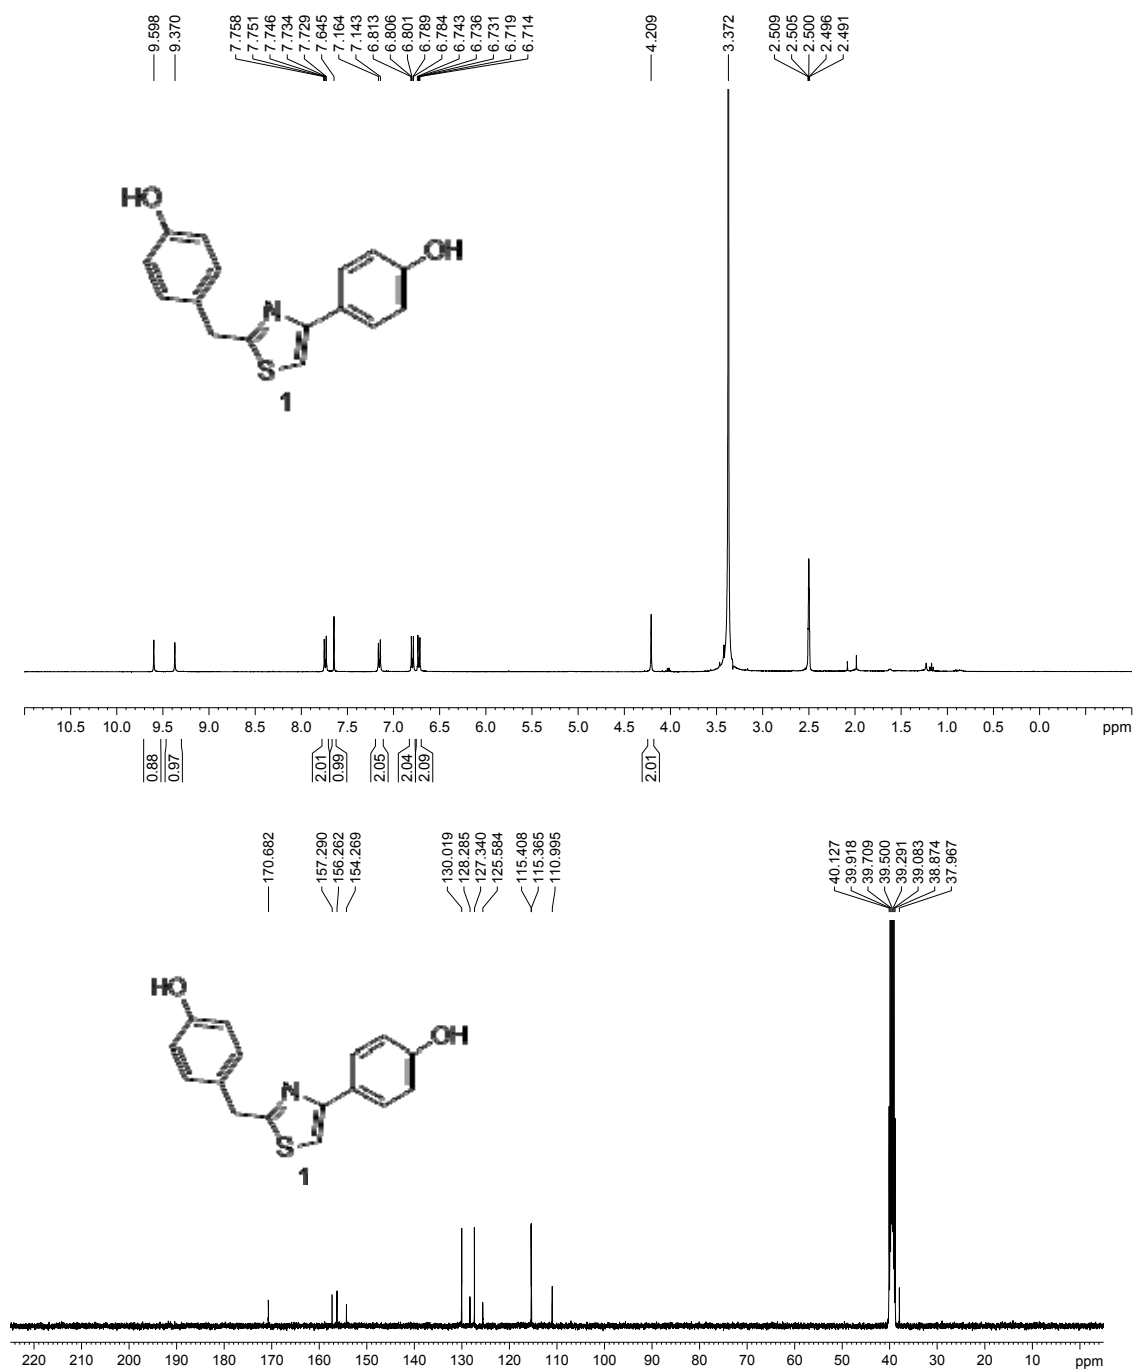Figure S2. <sup>1</sup>H-NMR and <sup>13</sup>C-NMR of compound 1.

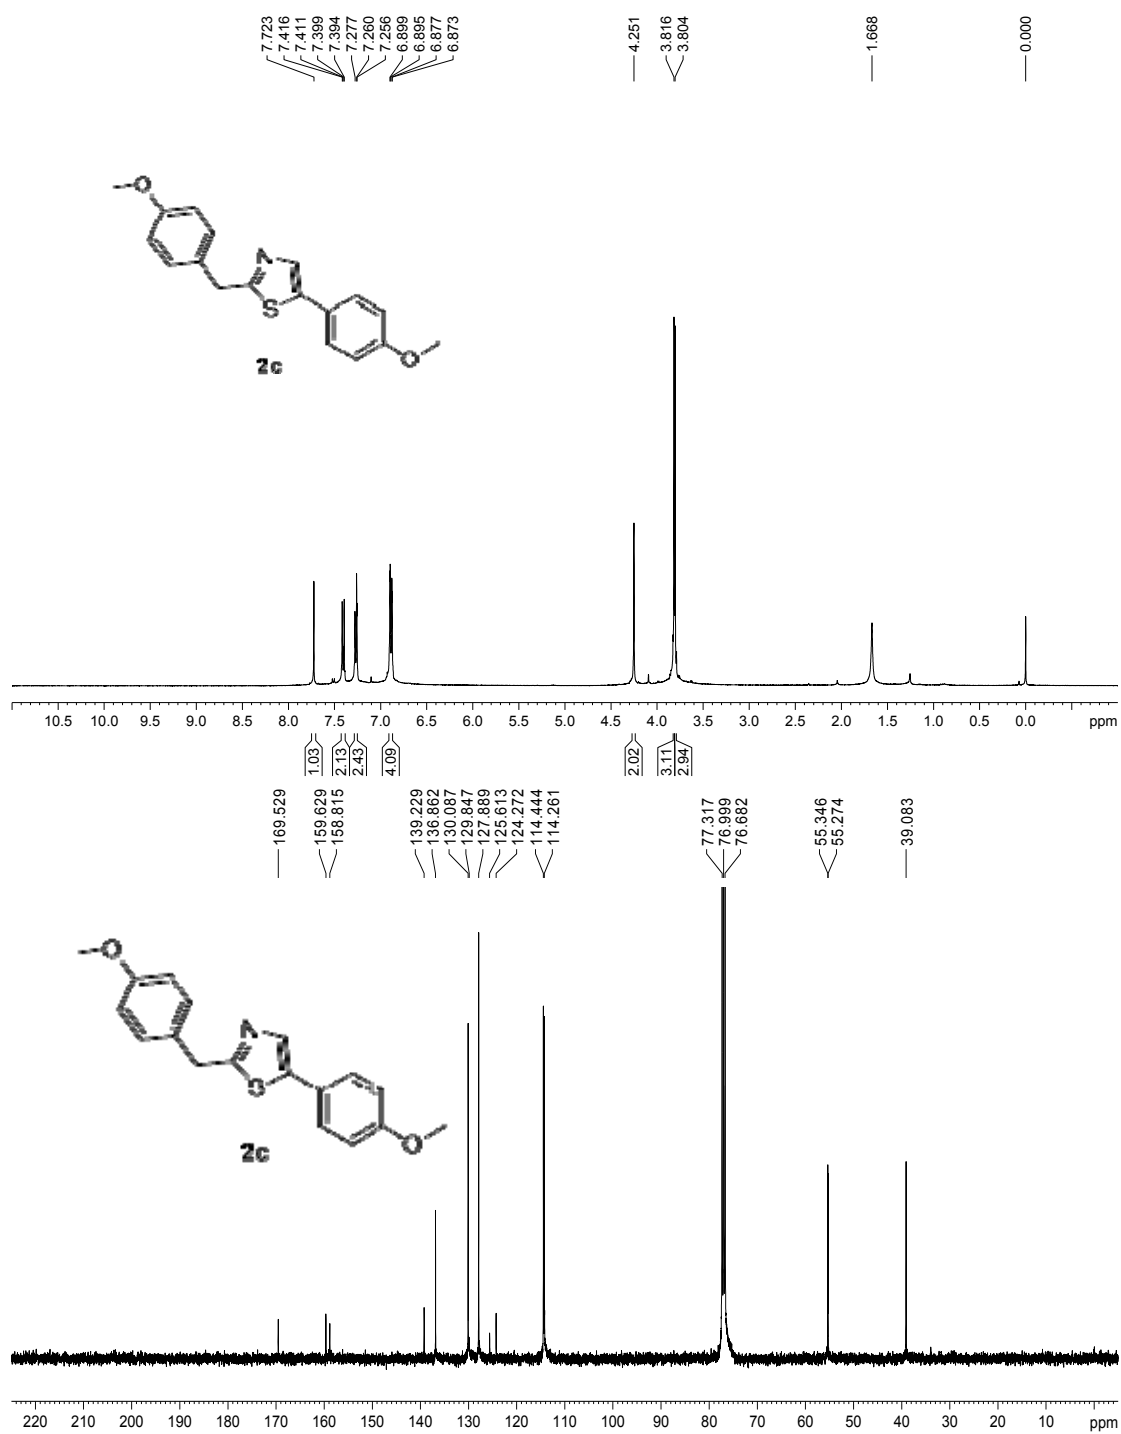Figure S3. <sup>1</sup>H-NMR and <sup>13</sup>C-NMR of compound 2c.

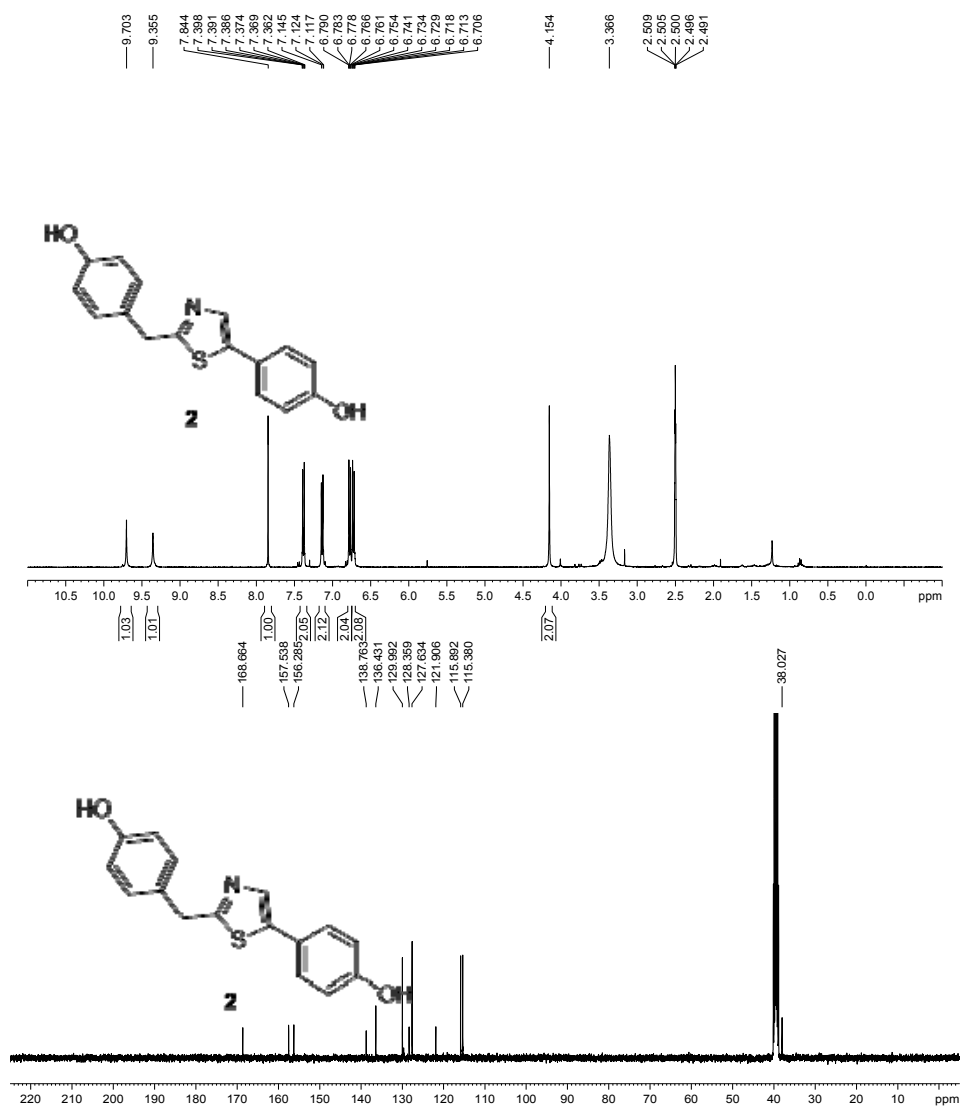Figure S4.  $^1\text{H}$ -NMR and  $^{13}\text{C}$ -NMR of compound 2.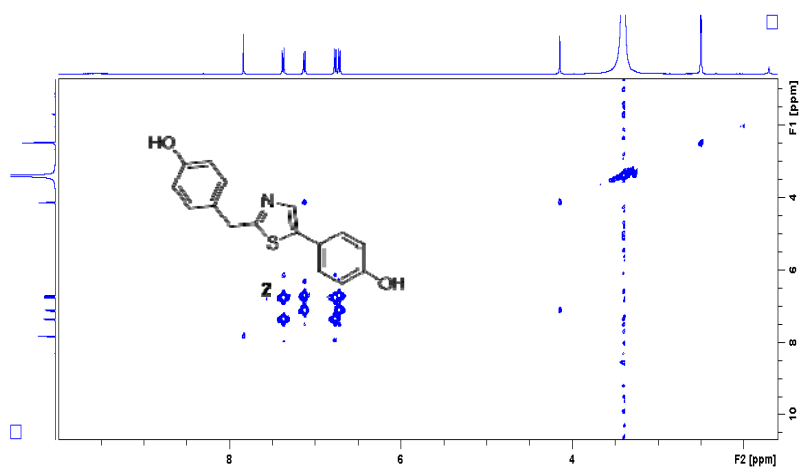Figure S5.  $^1\text{H}$ - $^1\text{H}$  COSY of compound 2.

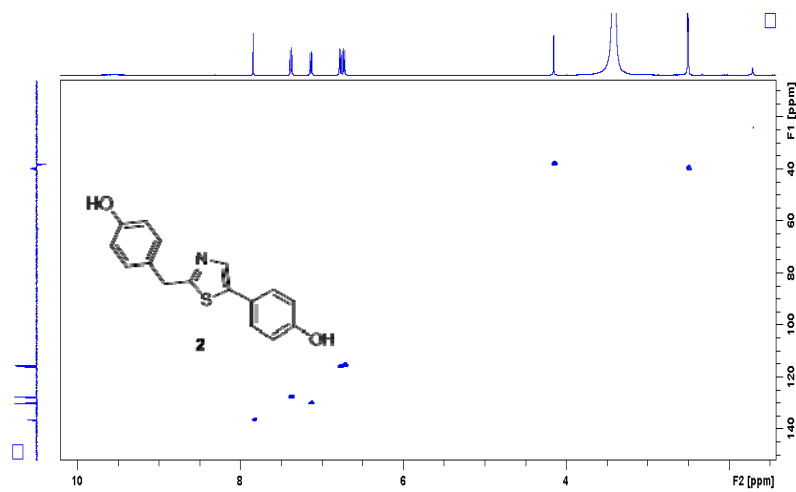

Figure S6. HSQC of compound 2.

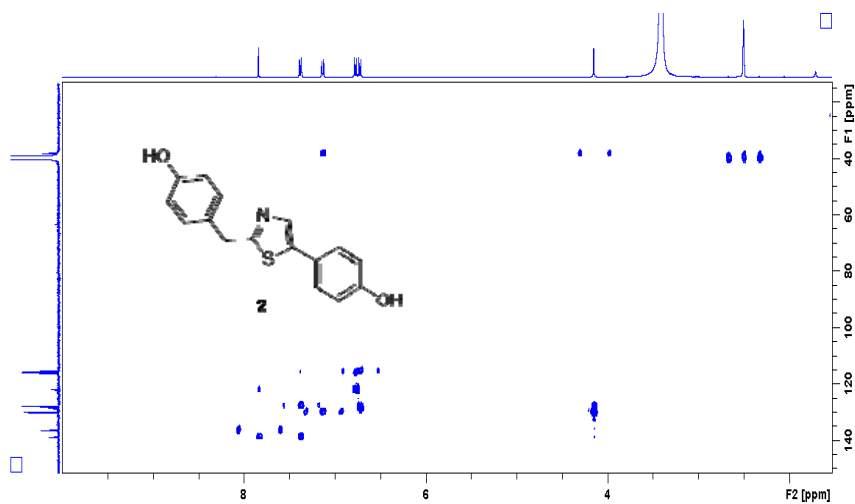

Figure S7. HMBC of compound 2.

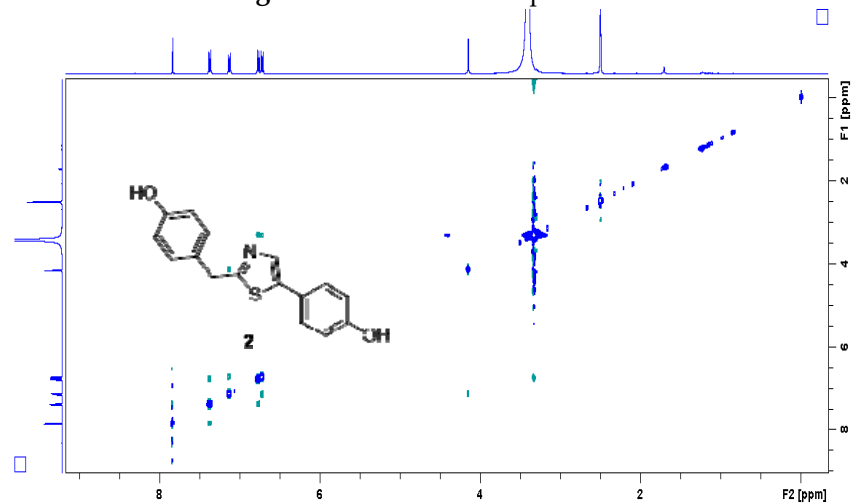

Figure S8. NOESY of compound 2.

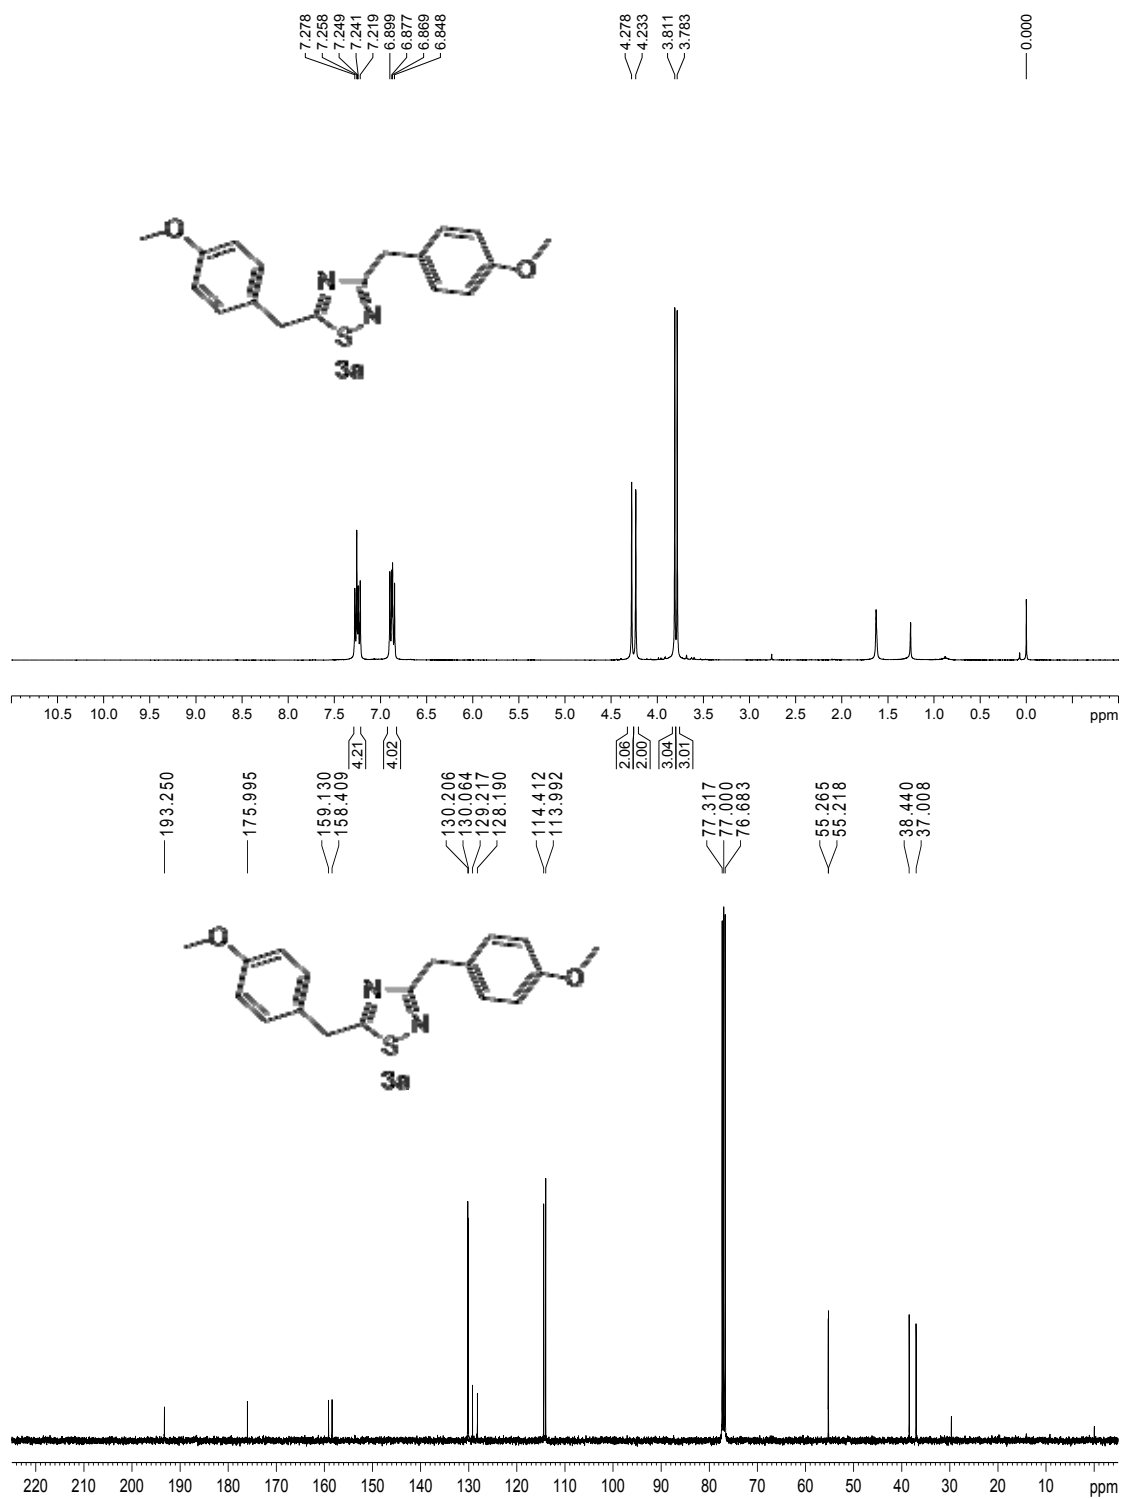Figure S9. <sup>1</sup>H-NMR and <sup>13</sup>C-NMR of compound 3a.

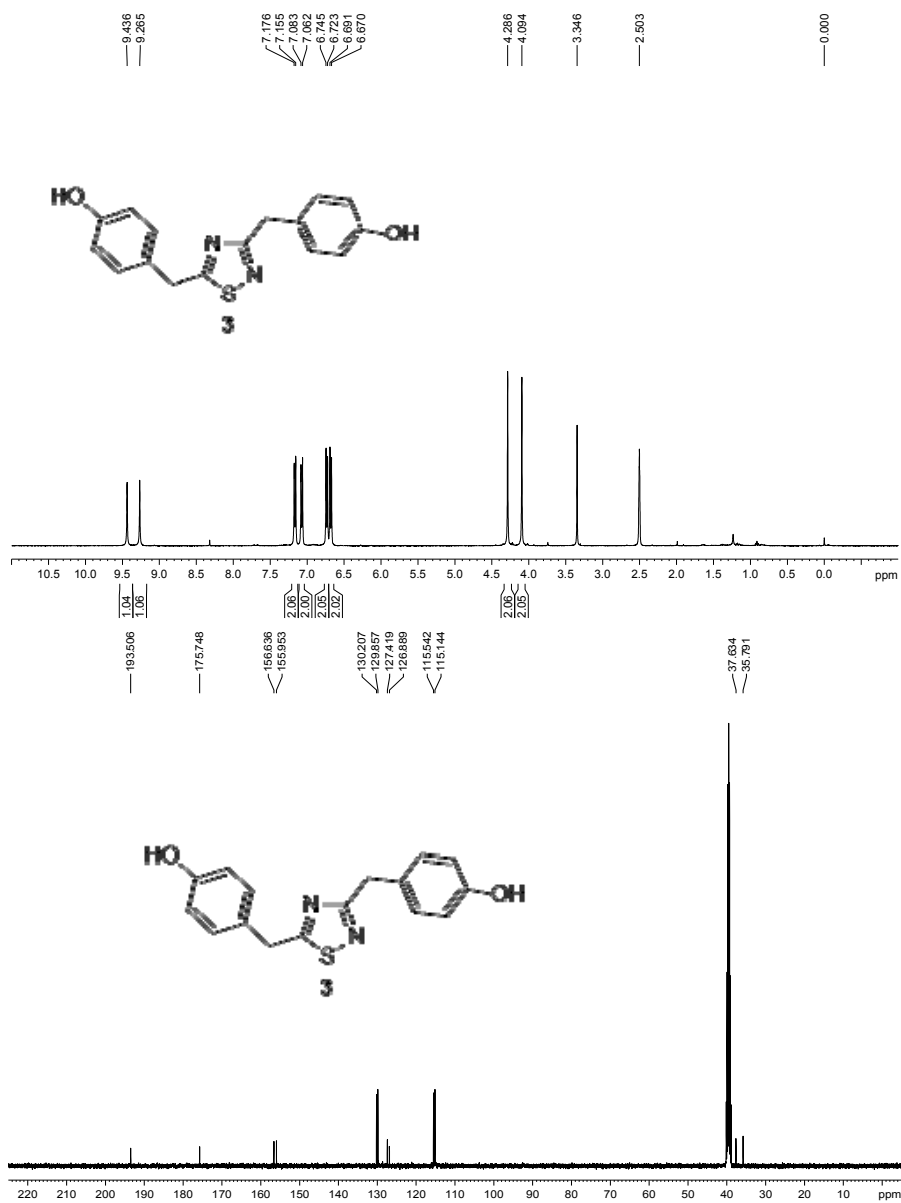Figure S10.  $^1\text{H}$ -NMR and  $^{13}\text{C}$ -NMR of compound 3.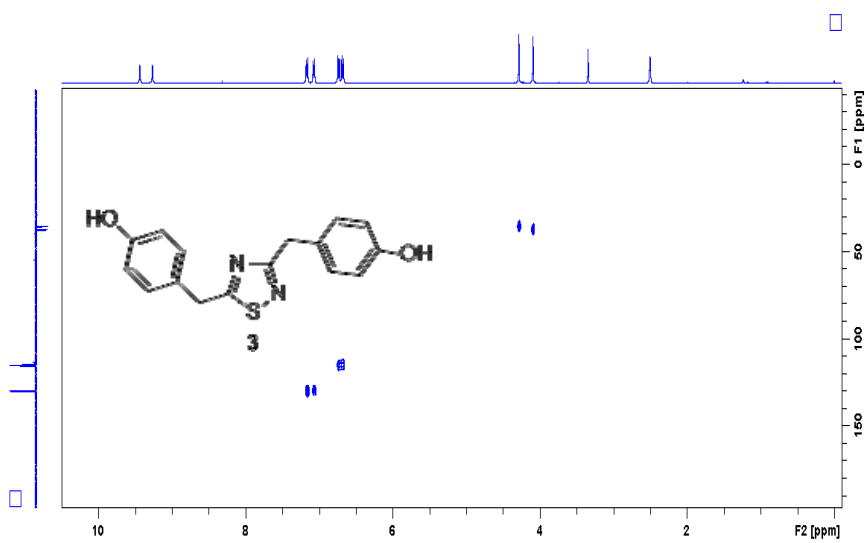

Figure S11. HSQC of compound 3.



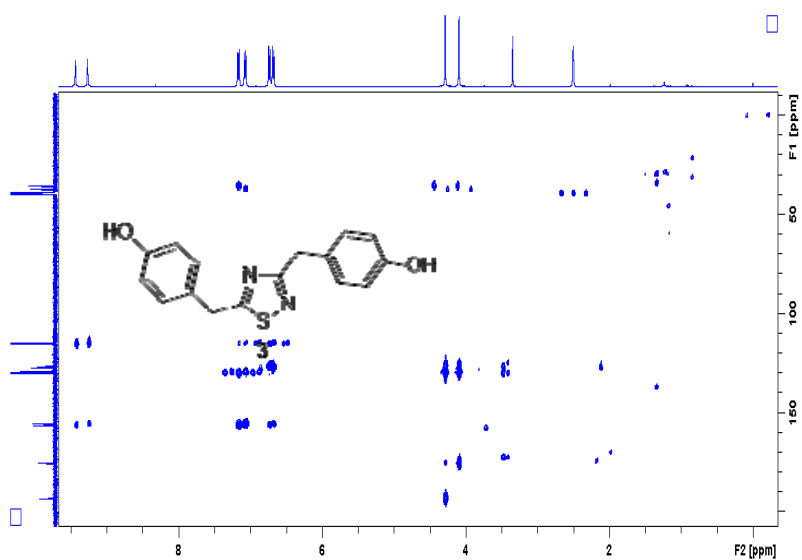

Figure S12. HMBC of compound 3.

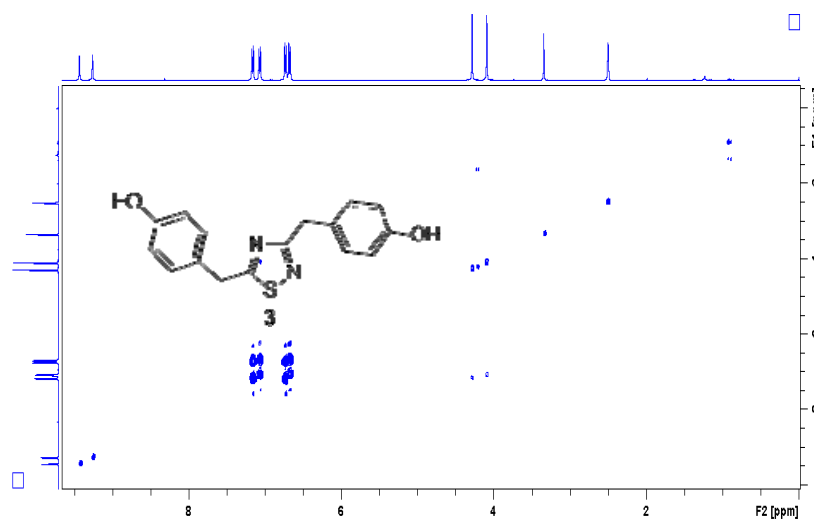Figure S13. <sup>1</sup>H-<sup>1</sup>H COSY of compound 3.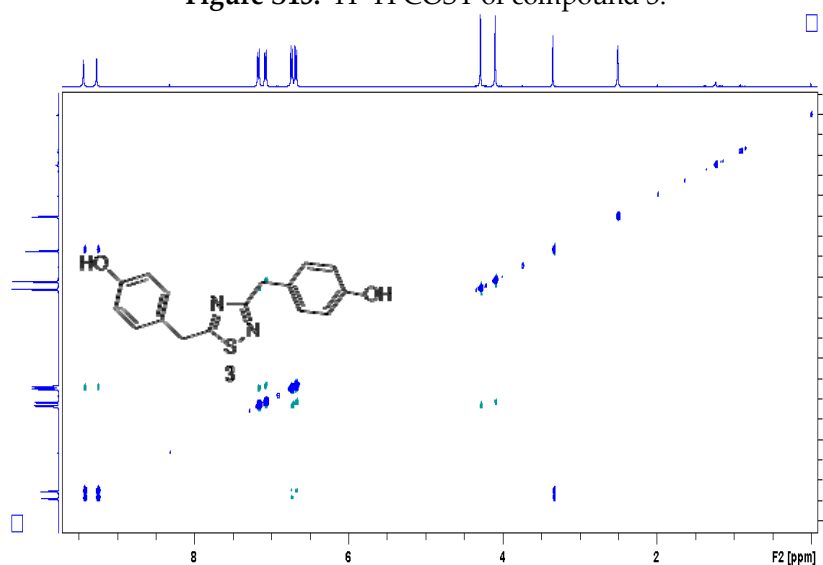

Figure S14. NOESY of compound 3.

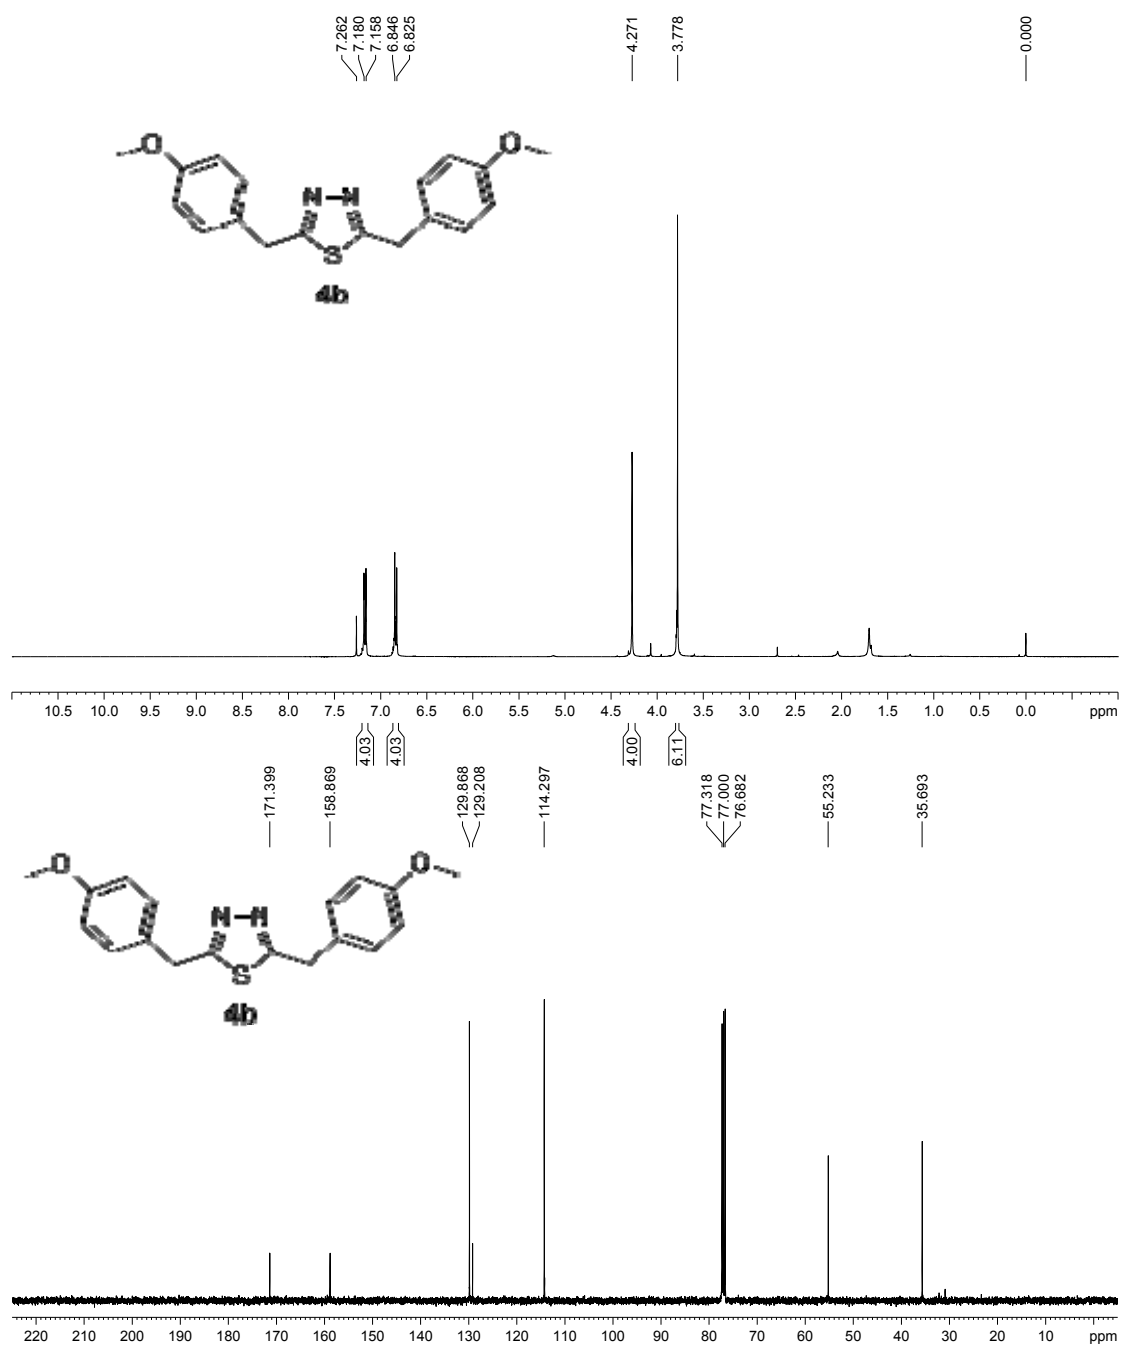Figure S15.  $^1\text{H-NMR}$  and  $^{13}\text{C-NMR}$  of compound 4b.

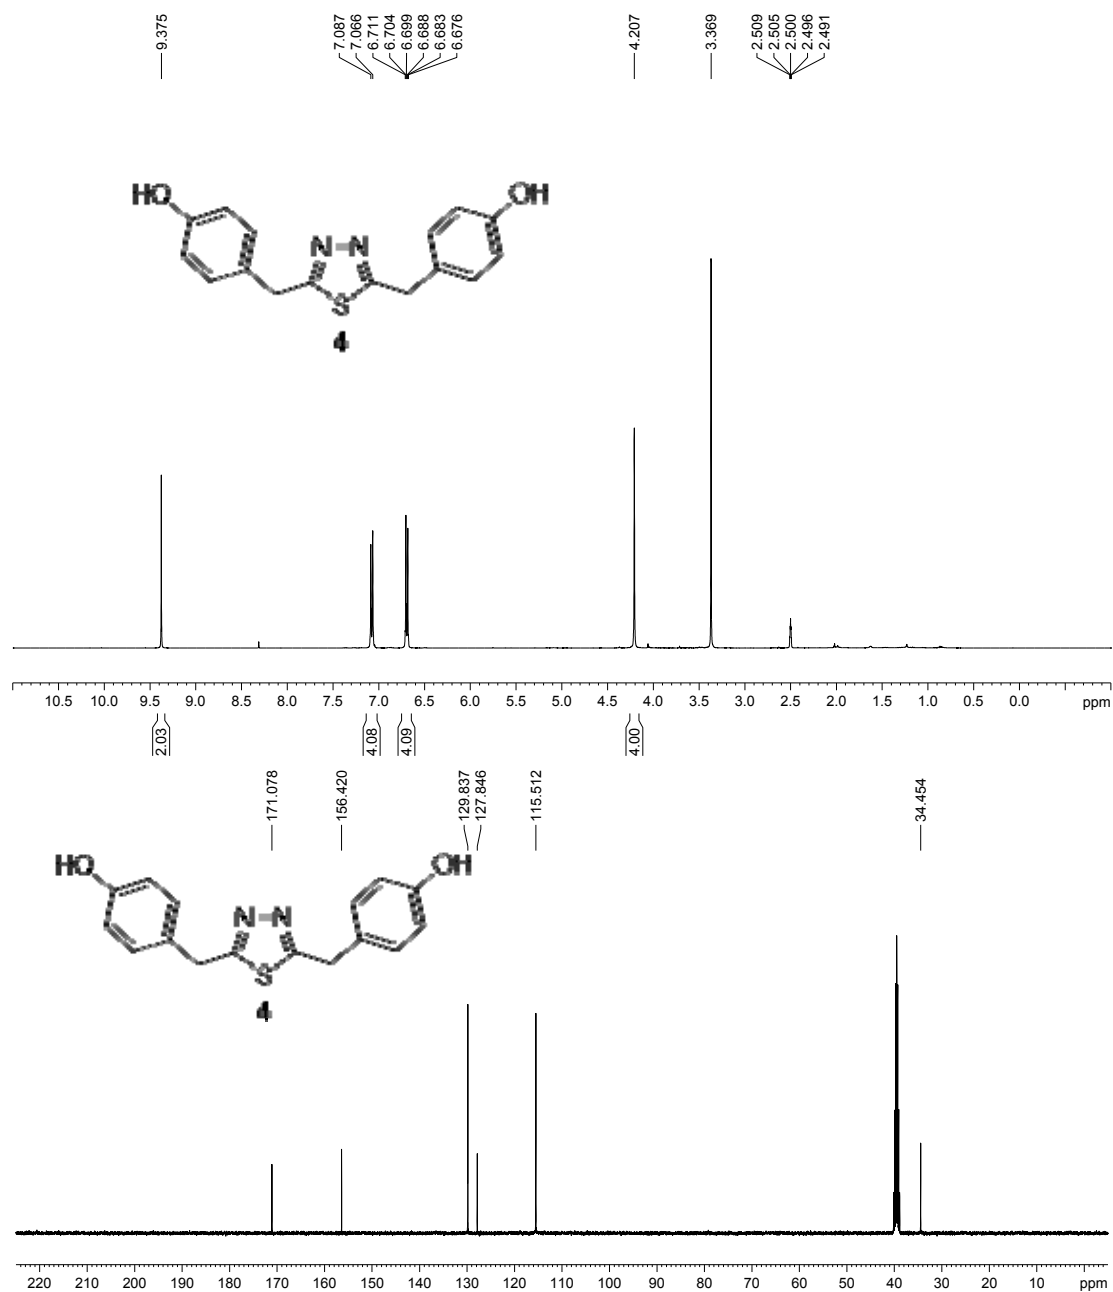

Figure S16.  $^1\text{H-NMR}$  and  $^{13}\text{C-NMR}$  of compound 4.

## 2. HPLC and $^{13}\text{C-NMR}$ Comparing Analysis

### 2.1. HPLC Comparing Analysis for Compound 2

Mobile phase:  $\text{CH}_3\text{CN-H}_2\text{O}$  with a linear gradient of  $\text{CH}_3\text{CN}$  from 10% to 65% in 30 min. The flow rate of 1.0 mL/min with UV detection at 224 nm using Venusil XBP  $\text{C}_{18}$  column (5  $\mu\text{m}$ , 100  $\text{\AA}$ , 4.6  $\times$  250 mm i.d), 30  $^\circ\text{C}$ .

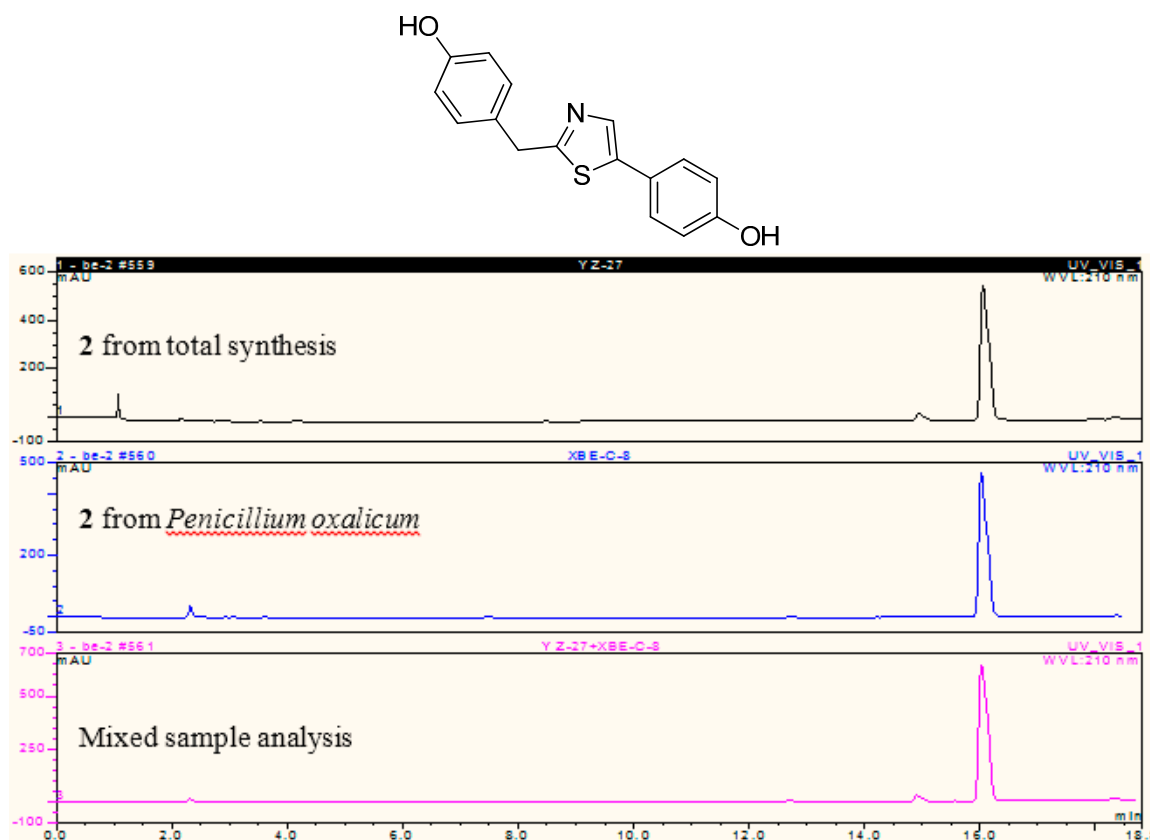

Figure S17. HPLC comparing analysis for compound 2.

### 2.2. $^{13}\text{C}$ -NMR Comparing Analysis for Compound 1 and 2

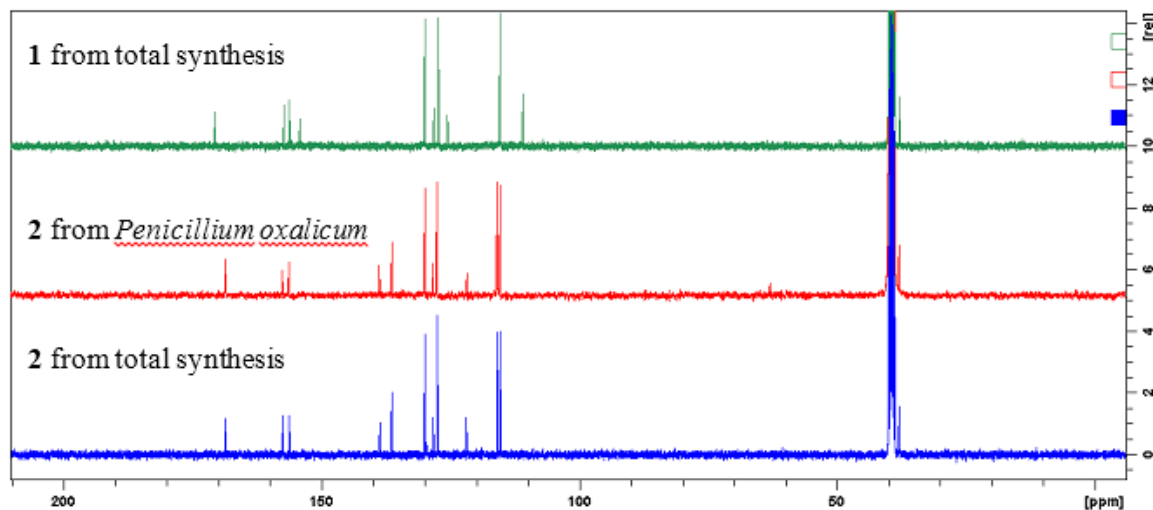

Figure S18.  $^{13}\text{C}$ -NMR comparing analysis for compound 1 and 2.

### 2.3. HPLC Comparing Analysis for Compound 3

Mobile phase: MeCN- $\text{H}_2\text{O}$  with a linear gradient of MeCN from 10% to 100% in 30 min. The flow rate of 1.0 mL/min with UV detection at 224 nm using Venusil XBP  $\text{C}_{18}$  column (5  $\mu\text{m}$ , 100  $\text{\AA}$ , 4.6  $\times$  250 mm i.d), 30  $^\circ\text{C}$ .

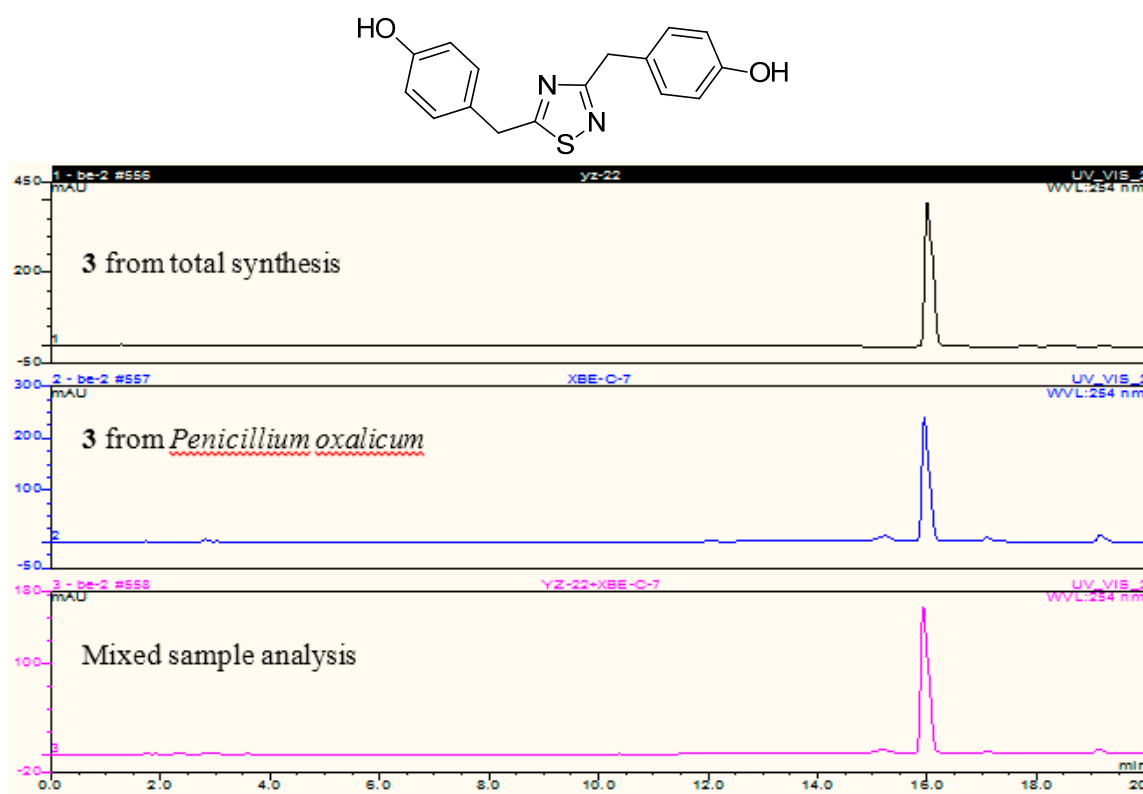

Figure S19. HPLC comparing analysis for compound 3.

#### 2.4. $^{13}\text{C}$ -NMR Comparing Analysis for Compound 3 and 4

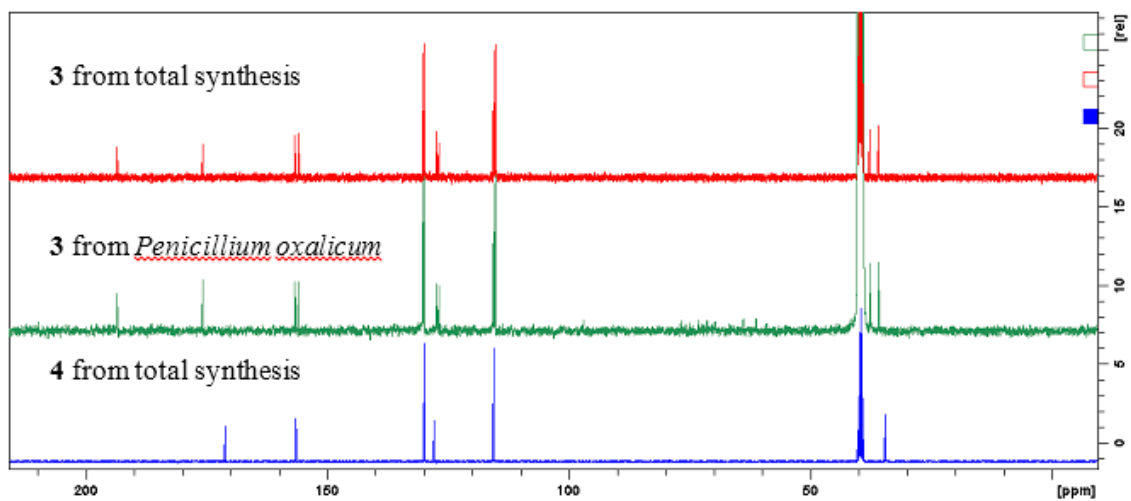

Figure S20.  $^{13}\text{C}$ -NMR comparing analysis for compound 3 and 4.

### 3. The Crystal Structure of 1g with Numbered Atoms

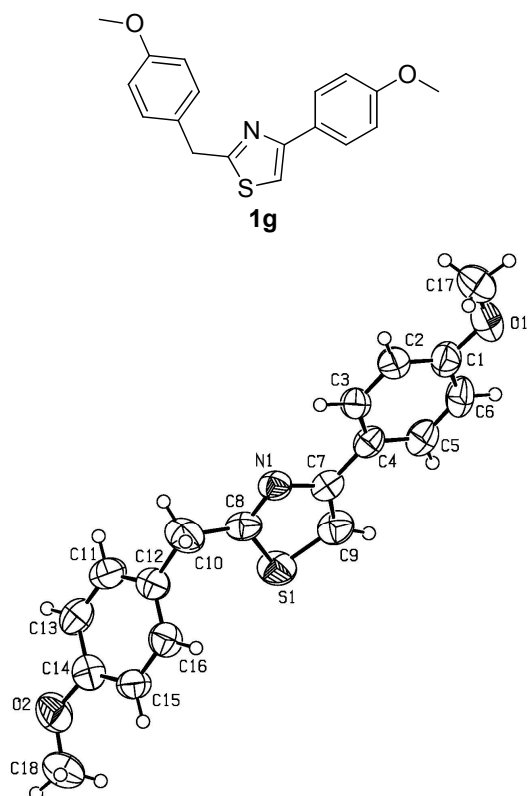

Figure S21. The crystal structure of compound 1g with numbered atoms.

### 4. The Crystal Structure of 2 with Numbered Atoms

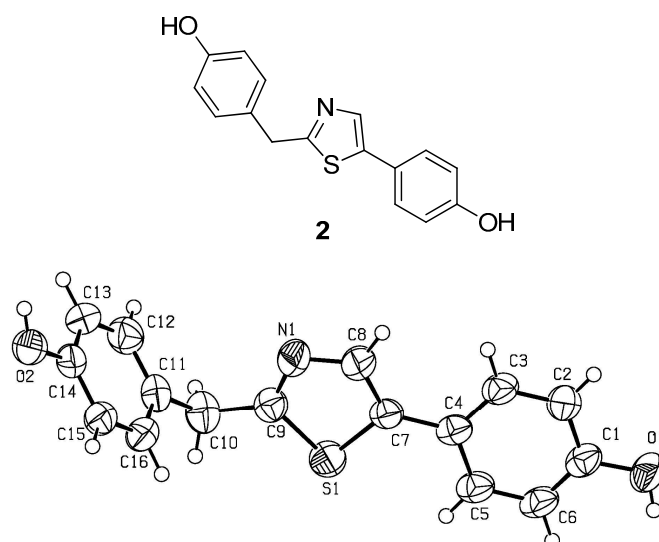

Figure S22. The crystal structure of compound 2 with numbered atoms.
